# Supplementary material
Source: Springer Nature journal article supplement (https://www.springermedizin.de/resource/supplementary/12889_2011_3394_MOESM1_ESM.pdf/9488924)
Supplement: MOESM1 [file 9488924]

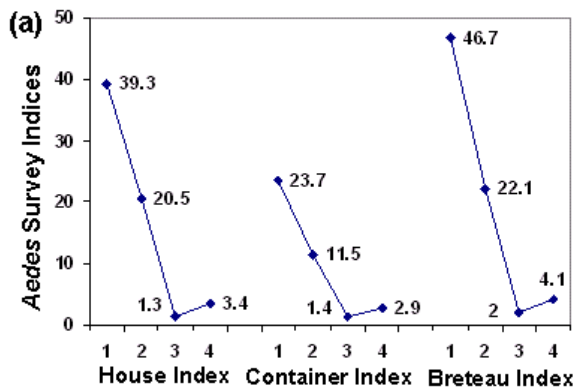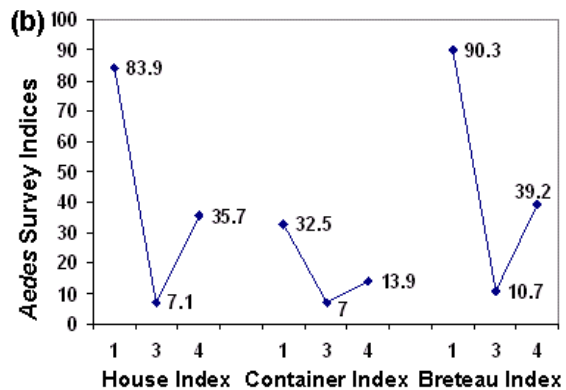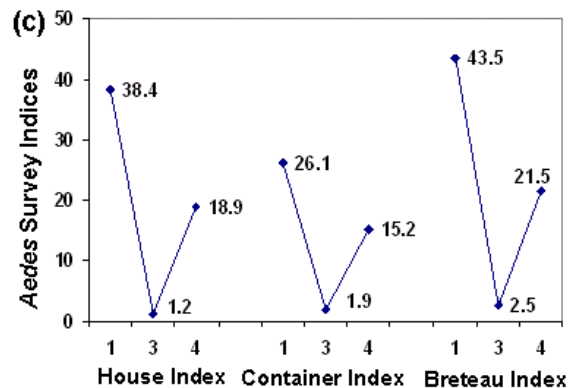

1. Baseline *Aedes* indices. 2. *Aedes* indices in post-IEC period in Domatmari. 3. One-week post-fish period. 4. One-month post-fish period

- (a) Impacts of IEC followed by IEC + *Poecilia* in Domatmari, Tumkur District. A total of 122 houses and 240 containers were checked. HI: 1 vs. 2: OR 0.52,  $p=0.068$ ; 1 vs. 3: OR 2.22,  $p<0.001$ ; 1 vs. 4: OR 1.81,  $p<0.001$ . CI: 1 vs. 2: OR 0.58,  $p=0.064$ ; 1 vs. 3: OR 1.54,  $p<0.001$ ; 1 vs. 4: OR 1.27,  $p<0.001$ . BI: 1 vs. 2: OR 0.54,  $p=0.067$ ; 1 vs. 3: OR 1.96,  $p<0.001$ ; 1 vs. 4: OR 1.58,  $p<0.001$ .
- (b) Impacts of *Poecilia* without IEC were assessed in Srinivaspura, Tumkur District. A total of 31 houses and 86 containers were checked. HI: 1 vs. 3: OR 1.69,  $p<0.001$ ; 1 vs. 4: OR 0.41,  $p=0.082$ . CI: 1 vs. 3: OR 1.78,  $p<0.001$ ; 1 vs. 4: OR 0.48,  $p=0.071$ . BI: 1 vs. 3: OR 1.63,  $p<0.001$ ; 1 vs. 4: OR 0.45,  $p=0.073$ .
- (c) Impacts of IEC + *Gambusia* were assessed in Balmanda, Kolar District. A total of 78 houses and 130 containers were checked. HI: 1 vs. 3: OR 2.16,  $p<0.001$ ; 1 vs. 4: OR 0.56,  $p=0.066$ . CI: 1 vs. 3: OR 2.24,  $p<0.001$ ; 1 vs. 4: OR 0.58,  $p=0.064$ . BI: 1 vs. 3: OR 2.18,  $p<0.001$ ; 1 vs. 4: OR 0.51,  $p=0.069$ .
